# Supplementary material for: 国際比較によるカナダ経済概観―経済成長，賃金，産業構造，貿易―
Source: Royal Society of Chemistry journal article supplement (doi:10.1039/d1cp01304a), 2000-03-10
Supplement: d1cp01304a1.pdf [file d1cp01304a1.pdf]

Supporting Information

# Infrequent Metadynamics Study of Rare-event Electrostatic Channeling

Yan Xie, Scott Calabrese Barton

Department of Chemical Engineering and Materials Science, Michigan State University, East Lansing, MI, 48824, USA. E-mail: scb@msu.edu

## Contents

1. Section S1. Definition of Infrequent Metadynamics Basins
2. Figure S1. Schematic of the KMC model
3. Figure S2. Association Distribution of G6P on the Poly-lysine Bridge
4. Figure S3. Electrostatic Energy between G6P and the Poly-arginine Bridge
5. Figure S4. Umbrella Sampling Energy Profiles
6. Figure S5. Production Concentration Versus Time in the KMC Model
7. Figure S6. Probability of the Adsorbed Intermediates on the Bridges
8. Table S1. Energy Barriers and Rate Constants
9. Table S2. KMC Parameters

## S1 Definition of Infrequent Metadynamics Basins

In the committor analysis of infrequent metadynamics, we defined 19 possible triple association basins, besides  $d_{246}$ , based on the assumption that the nearby index difference of the three indexes of  $d_{ijk}$  should not be greater than 2. For instance,  $d_{123}$ ,  $d_{124}$ ,  $d_{135}$  and  $d_{134}$  are possible, but not  $d_{125}$  or  $d_{145}$ . Therefore, these basins below are all assumed to be possible triple association basins:  $d_{123}$ ,  $d_{124}$ ,  $d_{134}$ ,  $d_{135}$ ,  $d_{234}$ ,  $d_{235}$ ,  $d_{245}$ ,  $d_{246}$ ,  $d_{345}$ ,  $d_{346}$ ,  $d_{356}$ ,  $d_{357}$ ,  $d_{456}$ ,  $d_{457}$ ,  $d_{467}$ ,  $d_{468}$ ,  $d_{567}$ ,  $d_{568}$ ,  $d_{578}$ , and  $d_{678}$ .

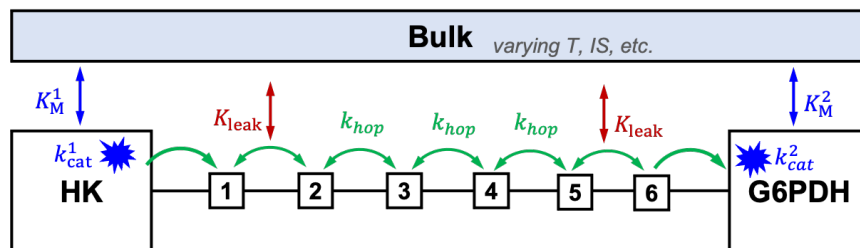

Fig. S1 Schematic of the KMC model.

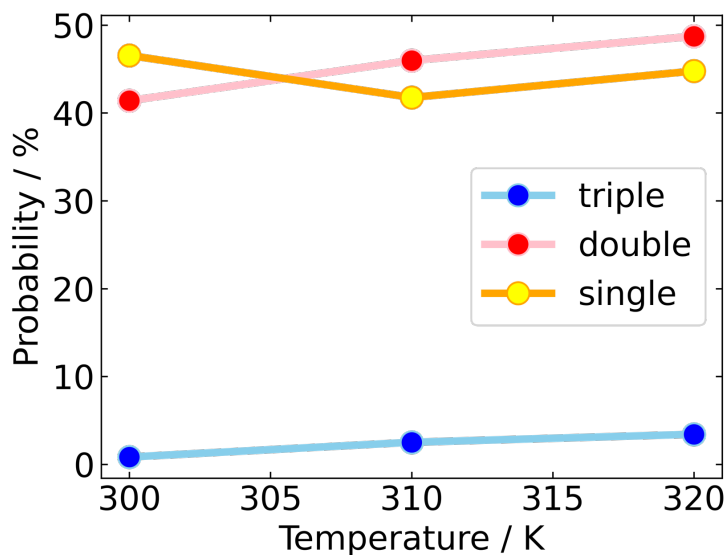

Fig. S2 Association state probability of G6P on the poly-lysine bridge.

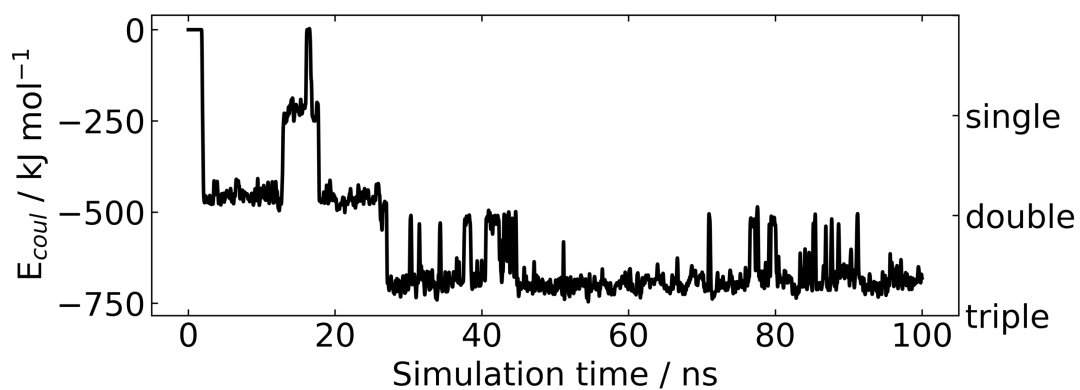

Fig. S3 Electrostatic energy between G6P and the poly-arginine bridge.

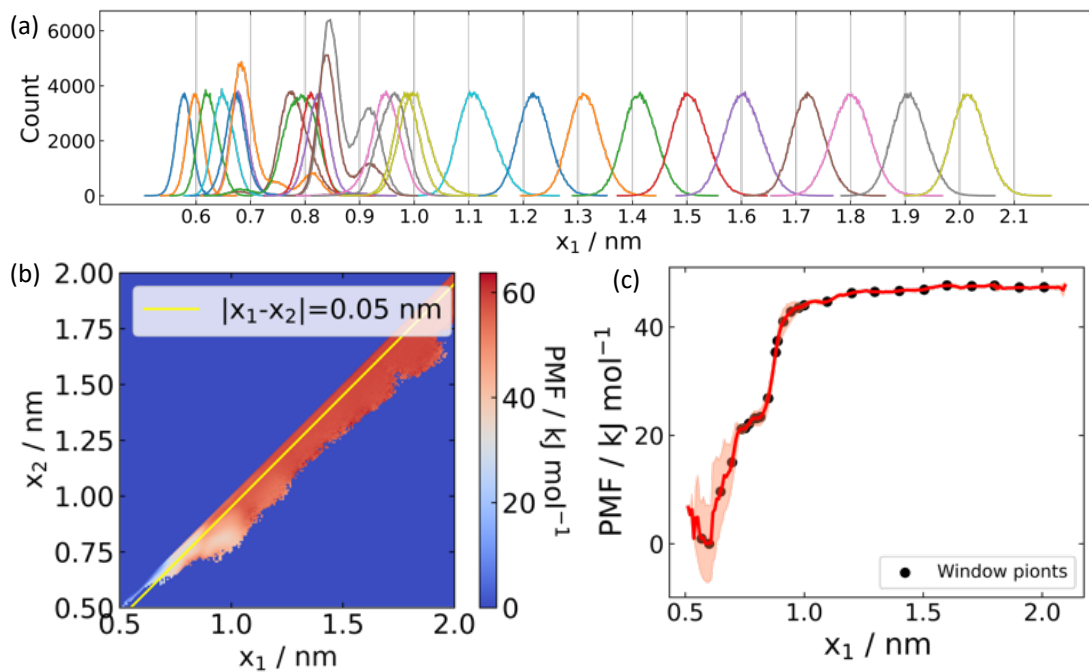

Fig. S4 (a) Example biased distribution of  $x_1$  of all the US windows at IS = 0 mM, temperature 300 K. (b) Example 2D energy plot of G6P desorption energy from the triple association on the poly-arginine peptide. Data above the yellow cutoff line was used for calculation of the PMF. (c) The projection of desorption energy on  $x_1$  at IS = 0 mM, temperature 300 K.

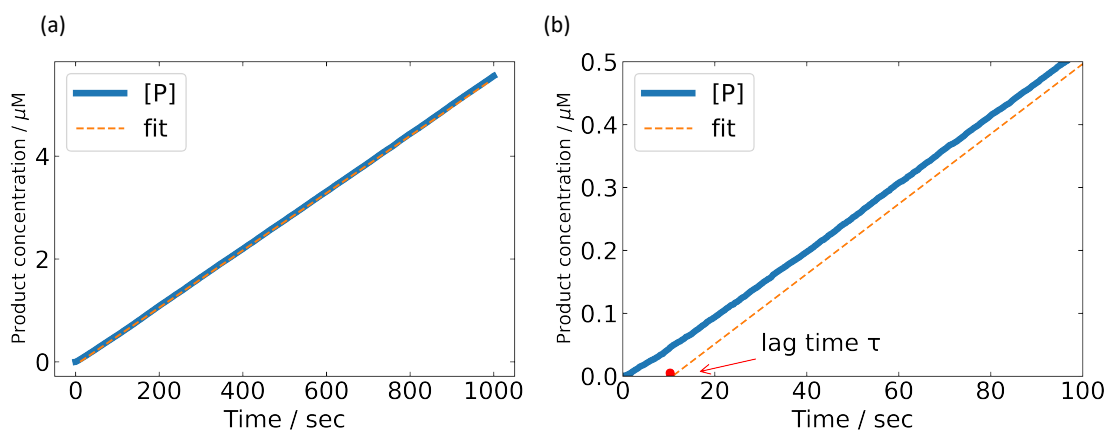

Fig. S5 Product concentration versus time at IS = 120 mM in the KMC model.

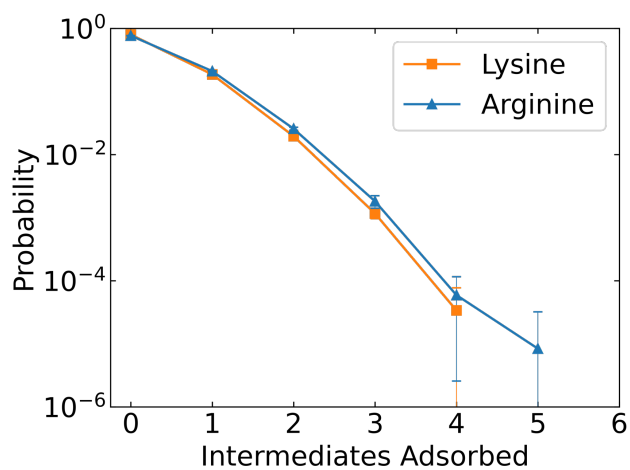

Fig. S6 Probability distribution of the number of adsorbed intermediates on the poly-lysine bridge and poly-arginine bridge.

Table S1. Energy barriers and rate constants

| IS  | $G_{hop}$ | $\Delta G_{des}$ | $\Delta G$ | $\frac{k_{hop}}{k_{des}}$ | $\frac{k_{ads}}{k_{des}} \times 10^6$ |
|-----|-----------|------------------|------------|---------------------------|---------------------------------------|
| mM  | kJ/mol    | kJ/mol           | kJ/mol     |                           |                                       |
| 0   | 25.1      | 47.4             | 22.3       | 7515                      | 179                                   |
| 20  | 25.1      | 45.6             | 20.5       | 3652                      | 87                                    |
| 40  | 25.1      | 42.6             | 17.5       | 1096                      | 26                                    |
| 70  | 25.1      | 41.2             | 16.1       | 625                       | 15                                    |
| 120 | 25.1      | 36.7             | 11.6       | 103                       | 2.5                                   |

IS: ionic strength

$G_{hop}$ ,  $k_{hop}$ : energy barrier and rate constant of hopping on the bridge from one triple association to an adjacent triple association

$\Delta G_{des}$ ,  $k_{des}$ : energy barrier and rate constant of desorption from triple association

$\Delta G$ : the energy difference between hopping and desorption  $\Delta G = G_{des} - G_{hop}$

Table S2. KMC parameters

| Region | Parameter                                                                  | Value                              |
|--------|----------------------------------------------------------------------------|------------------------------------|
| System | $C_{HK-G6PDH}$ , cascade concentration, mol L <sup>-1</sup>                | $8 \times 10^{-9}$                 |
|        | Vol, reaction volume, L                                                    | $2.1 \times 10^{-14}$              |
|        | $C_{sub}$ , substrate concentration for HK, mol L <sup>-1</sup>            | 2                                  |
| HK     | $k_{cat}^{HK}$ , TOF of HK, molec s <sup>-1</sup>                          | 0.7                                |
|        | $k_{des}^{HK}$ , desorption rate on HK, s <sup>-1</sup>                    | 0.07                               |
|        | $k_{ads}^{HK}$ , absorption rate on HK, s <sup>-1</sup>                    | $7.7 \times 10^4$                  |
|        | $k_{hop}^{1b}$ , hopping rate from HK to bridge, s <sup>-1</sup>           | $k_{hop}$                          |
|        | $K_{M,1}^{HK}$ , Michaelis constant of HK, mM                              | $10^{-5}$                          |
| Bridge | $k_{hop}$ , hopping rate on bridge, s <sup>-1</sup>                        | $k_{cat}^{HK} \times 100 = 70$     |
|        | $k_{des}$ , desorption rate on bridge, s <sup>-1</sup>                     | $\frac{k_{hop}}{k_{hop}/k_{des}}$  |
|        | $k_{ads}$ , adsorption rate on bridge, s <sup>-1</sup> mol <sup>-1</sup> L | $k_{des} \times (k_{hop}/k_{des})$ |
| G6PDH  | $k_{hop}^{b2}$ , hopping rate from bridge to G6PDH, s <sup>-1</sup>        | $k_{hop}$                          |
|        | $k_{cat}^{G6PDH}$ , TOF of G6PDH, molec s <sup>-1</sup>                    | 6.2                                |
|        | $k_{des}^{G6PDH}$ , desorption rate on G6PDH, s <sup>-1</sup>              | 0.62                               |
|        | $k_{ads}^{G6PDH}$ , absorption rate on G6PDH, s <sup>-1</sup>              | $1.3 \times 10^6$                  |
|        | $K_{M,2}$ , Michaelis constant of G6PDH, mM                                | $5.4 \times 10^{-6}$               |

\* The value of  $k_{hop}/k_{des}$  is from Table S1.
